# Supplementary material for: High-luminescence non-doped green OLEDs based on a 9,9-diarylfluorene-terminated 2,1,3-benzothiadiazole derivative
Source: Royal Society of Chemistry journal article supplement (doi:10.1039/b814082k), 2008-12-18
Supplement: b814082k.pdf [file b814082k.pdf]

## High-Luminescence Non-Doped Green OLEDs Based on a 9,9-Diarylfuorene-Terminated 2,1,3-Benzothiadiazole Derivative

Sung-Yu Ku<sup>a</sup>, Liang-Chen Chi<sup>a</sup>, Wen-Yi Hung<sup>b\*</sup>, Shih-Wei Yang<sup>b</sup>, Tsung-Cheng Tsai<sup>b</sup>, Ken-Tsung Wong<sup>a\*</sup>,  
Yu-Hung Chen<sup>c</sup>, and Chih-I Wu<sup>c</sup>

<sup>a</sup> Department of Chemistry, National Taiwan University, Taipei 106, Taiwan. Fax 886 2 33661667;  
Tel: 886 2 33661665; E-mail: kenwong@ntu.edu.tw

<sup>b</sup> Institute of Optoelectronic Sciences, National Taiwan Ocean University, Keelung 202, Fax: 886 2  
24634360; Tel: 886 2 24622192 ext. 6718; E-mail: wenhung@mail.ntou.edu.tw

<sup>c</sup> Department of Electrical Engineering and Graduate Institute of Photonic and Optoelectronic  
Engineering, National Taiwan University, Taipei 106, Taiwan

### Electronic Supplementary Information

After optimizing the device configurations, we concluded that the device incorporated with **DPAInT2** as the hole injection and **DPAInF** as the hole transportation layers give the best results. The optimized device structure is: [ITO/ **DPAInT2** (20 nm)/ **DPAInF** (20 nm)/TCTA (10 nm)/**DFBTA** (30 nm)/ETL (30 nm)/LiF (0.5 nm)/Al (150 nm)]. We used **DFBTA**, Alq3, and TAZ as the electron transporting layer (ETL), respectively. By comparison of the EL spectra of devices incorporated with different ETLs (**DFBTA**, Alq3, and TAZ) to the PL spectrum of Alq3 (Fig. S-1), in addition, the PL of **DFBTA** thin film nicely fits to the device EL spectrum (Fig. 2 in the main text), thus the EL from Alq3 can be clearly excluded.

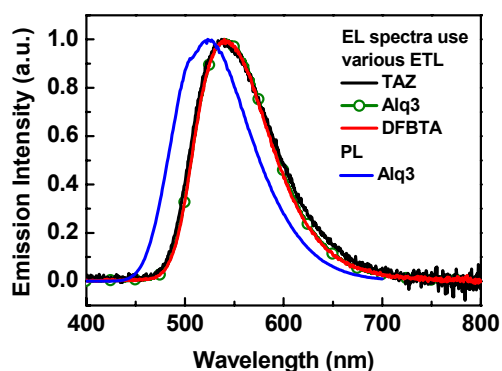

However, the device with 3-(biphenyl-4-yl)-4-phenyl-5-(4-tert-butylphenyl)-1,2,4- triazole (TAZ), instead of Alq3, as the ETL in the optimized device configuration: [ITO/ **DPAInT2** (20 nm)/ **DPAInF** (20 nm)/TCTA (10 nm)/**DFBTA** (30 nm)/ETL (30 nm)/LiF (0.5 nm)/Al (150 nm)] gave relatively

lower maximum  $\eta_{\text{ext}}$  (3.13%) as compared to that of the parent device. Fig. S-2 depicts the comparisons of the device characteristics of these two devices.

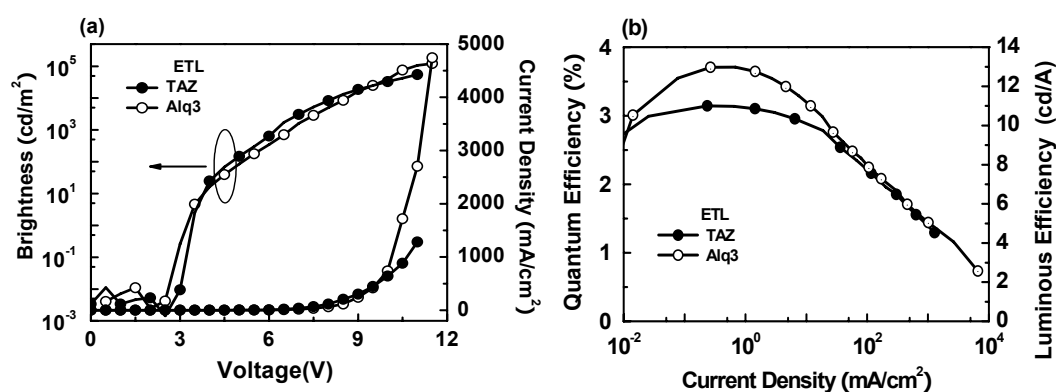

Fig. S-2. Performances of devices using TAZ and Alq3 as the ETL in device of ITO/ **DPAlnT2** (20 nm)/ **DPAlnF** (20 nm)/TCTA (10 nm)/**DFBTA** (30 nm)/ETL (30 nm)/LiF (0.5 nm)/Al (150 nm): (a) current density–voltage–brightness ( $I$ – $V$ – $L$ ) characteristics; (b) external quantum efficiency and luminance efficiency plotted with respect to current density.

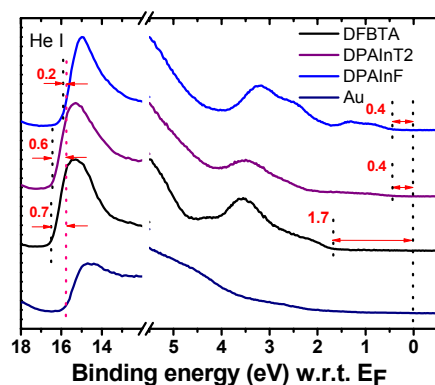

Fig. S-3. Ultraviolet photoelectron spectroscopy (UPS) measurements of **DFBTA**, **DPAlnT2** and **DPAlnF**.

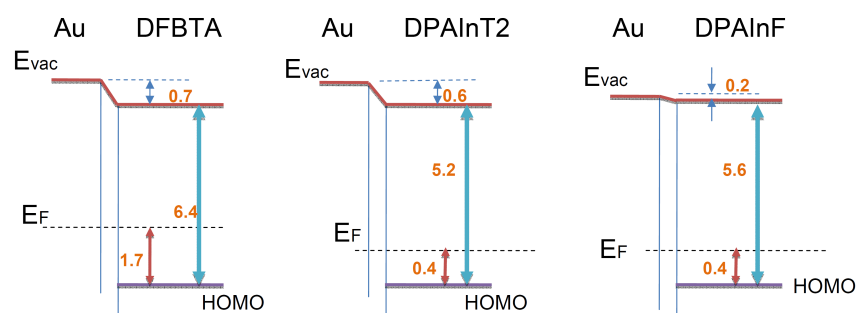

Fig. S-4. The energy band diagrams of **DFBTA**, **DPAlnT2** and **DPAlnF** can be obtained from the UPS data as illustrated.
